# Supplementary material
Source: HighWire-hosted journal article supplement (https://erj.ersjournals.com/content/53/3/1802165)
Supplement: inline-supplementary-material-1 [file inline-supplementary-material-1.pdf]

## **Appendix 1 - Details of search strategies**

### **MEDLINE (Ovid)**

1. exp Pneumonia/
2. exp Community-Acquired Infections/
3. "community-acquired pneumonia.tw.
4. exp "Outcome Assessment (Health Care)"/
5. exp "Recovery of Function"/
6. exp "Activities of Daily Living"/
7. exp Symptom Assessment
8. exp Treatment Outcome/
9. exp Patient Readmission/
10. symptom recovery.tw.
11. symptomatic recovery.tw.
12. functional recovery.tw.
13. 1 and 2
14. 3 or 13
15. OR/ 4-12
16. 14 and 15

**EMBASE (OVID)**

1. exp pneumonia/
2. exp community acquired infection/
3. community acquired pneumonia\*.tw.
4. community-acquired pneumonia\*.tw.
5. 1 and 2
6. OR/ 3-5
7. exp outcome assessment/
8. recovery of function\*.mp. or exp convalescence/
9. exp daily life activity/
10. exp symptom assessment/
11. exp treatment outcome/
12. exp hospital readmission/
13. symptom recovery\*.tw.
14. symptomatic recovery\*.tw.
15. OR/ 7-14
16. 6 and 15

**AMED (OVID)**

1. exp Pneumonia/
2. community-acquired infection\*.mp.
3. community-acquired pneumonia\*.mp.
4. community acquired pneumonia\*.mp.
5. OR/ 1-4
6. exp "recovery of function"/
7. exp "Activities of daily living"/
8. exp Symptoms/
9. exp Treatment outcome/
10. exp Rehabilitation/
11. patient readmission\*.mp.
12. functional recovery\*.mp.
13. OR/ 6-12
14. 5 and 13

**Appendix 2; Online supplementary material; Table S1; Risk of bias in included studies**

| First Author             | Primary Outcome                                                                                                     | Selection Domain (max 3) | Outcome Domain (max 3) | Comments                                                                                             |
|--------------------------|---------------------------------------------------------------------------------------------------------------------|--------------------------|------------------------|------------------------------------------------------------------------------------------------------|
| <b>Adamuz 2011</b>       | Additional healthcare utilisation within 30days of discharge                                                        | 3                        | 2                      | Outcome measure not clearly defined or justified                                                     |
| <b>Adamuz 2015</b>       | Additional healthcare utilisation within 30days of discharge                                                        | 3                        | 3                      |                                                                                                      |
| <b>Bruns 2010</b>        | Rate of radiographic resolution                                                                                     | 2                        | 2                      | 20.1% loss to follow-up                                                                              |
| <b>Carratala 2005</b>    | Successful outcome' - composite of 7 predefined criteria                                                            | 3                        | 3                      | Low severity CAP (PSI classes II and III only)                                                       |
| <b>Daniel 2018</b>       | Healthcare re-consultation within 4 weeks of discharge                                                              | 2                        | 3                      | Working age adults, low severity CAP                                                                 |
| <b>El Moussaoui 2006</b> | Pneumonia related symptoms during follow-up                                                                         | 2                        | 2                      | Low severity CAP                                                                                     |
| <b>Fine 1999</b>         | Not defined - process of care and outcome of outpatients and hospitalised patients with CAP                         | 2                        | 2                      |                                                                                                      |
| <b>Labarere 2007</b>     | 30 day mortality rate                                                                                               | 2                        | 3                      | Low severity CAP                                                                                     |
| <b>Marrie 2000</b>       | Proportion of patients with symptom resolution at 6 weeks                                                           | 2                        | 2                      | No details regarding loss to follow-up                                                               |
| <b>Metlay 1998</b>       | Proportion of patients with symptom resolution at 4 weeks                                                           | 2                        | 2                      |                                                                                                      |
| <b>Nickler 2016</b>      | Decline in QoL from hospital admission (baseline) to day 30 and after 6 years.                                      | 2                        | 2                      | Not representative sample excluded elderly, dementia, significant co-morbid disease                  |
| <b>Sharma 2006</b>       | Decline in ADL score by at least 1 point, comparing baseline prehospitization ADL to 1 and 6 months post discharge. | 2                        | 2                      | Not representative sample, from cohort study of delirium in elderly, no details on loss to follow-up |
| <b>Uranaga 2016</b>      | Clinical success rate at day 10 and day 30 since admission                                                          | 3                        | 3                      |                                                                                                      |
| <b>Wootoon 2017</b>      | Time for symptomatic recovery to baseline                                                                           | 2                        | 2                      | Excluded patients with cognitive impairment, no loss to follow-up information                        |
| <b>Wyrwich 2015</b>      | Time for symptom resolution                                                                                         | 0                        | 2                      |                                                                                                      |
